# Supplementary material
Source: PubMed Central journal article supplement (PMC7735192)

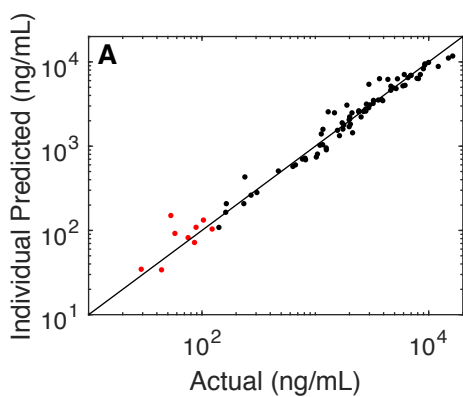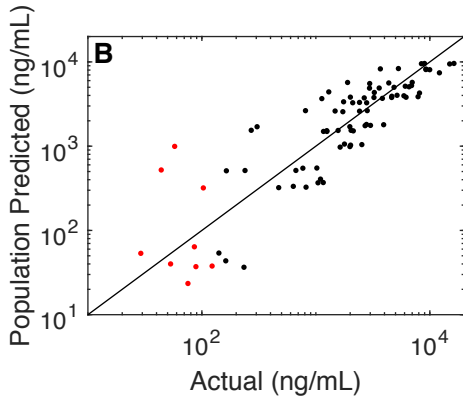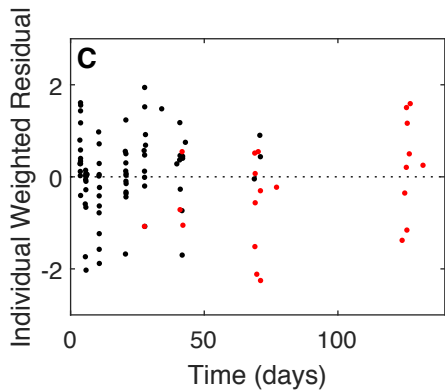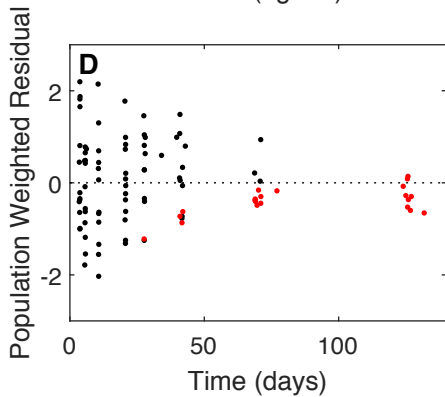

Supplement: NIHMS1651750-supplement-1651750_Supp_Fig1.pdf [file NIHMS1651750-supplement-1651750_Supp_Fig1.pdf]
